# Supplementary material for: Production, Characterization, and Antioxidant Activity of Fucoxanthin from the Marine Diatom Odontella aurita
Source: MDPI journal article supplement (doi:10.3390/md11072667), 2013-07-23
Supplement: s1 [file s1]

marinedrugs-11-02667-s001.mol
  corina  04141406443D 1   1.00000     0.00000 
CORINA 3.49 0023  12.04.2013
 48 50  0  0  0  0  0  0  0  0999 V2000
    3.1159    0.5177   -0.3050 C   0  0  0  0  0  0  0  0  0  0  0  0
    1.7365    0.2507   -0.9177 C   0  0  0  0  0  0  0  0  0  0  0  0
    0.8366    1.4543   -0.6381 C   0  0  0  0  0  0  0  0  0  0  0  0
    0.7876    1.7484    0.8531 C   0  0  0  0  0  0  0  0  0  0  0  0
    1.9079    1.2626    1.7597 C   0  0  0  0  0  0  0  0  0  0  0  0
    3.0139    0.3630    1.2125 C   0  0  0  0  0  0  0  0  0  0  0  0
    1.8660    0.0662   -2.3288 O   0  0  0  0  0  0  0  0  0  0  0  0
    0.1494    3.0887    1.2236 C   0  0  0  0  0  0  0  0  0  0  0  0
    2.3075    2.1609    2.9320 C   0  0  0  0  0  0  0  0  0  0  0  0
    2.6974   -1.0945    1.5536 C   0  0  0  0  0  0  0  0  0  0  0  0
    4.3478    0.7525    1.8528 C   0  0  0  0  0  0  0  0  0  0  0  0
    0.5903    0.6913    1.7821 O   0  0  0  0  0  0  0  0  0  0  0  0
    2.8855    3.4486    2.4040 C   0  0  0  0  0  0  0  0  0  0  0  0
    3.2268    4.4741    3.2869 C   0  0  0  0  0  0  0  0  0  0  0  0
    3.7574    5.6563    2.8022 C   0  0  0  0  0  0  0  0  0  0  0  0
    4.0985    6.6812    3.6846 C   0  0  0  0  0  0  0  0  0  0  0  0
    4.6296    7.8645    3.1993 C   0  0  0  0  0  0  0  0  0  0  0  0
    4.9704    8.8882    4.0807 C   0  0  0  0  0  0  0  0  0  0  0  0
    5.5022   10.0732    3.5948 C   0  0  0  0  0  0  0  0  0  0  0  0
    5.8423   11.0952    4.4748 C   0  0  0  0  0  0  0  0  0  0  0  0
    6.3753   12.2825    3.9879 C   0  0  0  0  0  0  0  0  0  0  0  0
    6.7146   13.3020    4.8657 C   0  0  0  0  0  0  0  0  0  0  0  0
    7.2491   14.4928    4.3774 C   0  0  0  0  0  0  0  0  0  0  0  0
    7.5872   15.5087    5.2521 C   0  0  0  0  0  0  0  0  0  0  0  0
    8.1242   16.7051    4.7615 C   0  0  0  0  0  0  0  0  0  0  0  0
    8.4578   17.7074    5.6245 C   0  0  0  0  0  0  0  0  0  0  0  0
    9.0003   18.9161    5.1288 C   0  0  0  0  0  0  0  0  0  0  0  0
    3.0545    3.5942    1.2078 O   0  0  0  0  0  0  0  0  0  0  0  0
    3.0174    4.2938    4.7684 C   0  0  0  0  0  0  0  0  0  0  0  0
    4.7609    8.7079    5.5622 C   0  0  0  0  0  0  0  0  0  0  0  0
    7.4585   14.6732    2.8960 C   0  0  0  0  0  0  0  0  0  0  0  0
    9.2097   19.0965    3.6474 C   0  0  0  0  0  0  0  0  0  0  0  0
    9.3278   19.9001    5.9759 C   0  0  0  0  0  0  0  0  0  0  0  0
    9.8290   21.0169    5.5180 C   0  0  0  0  0  0  0  0  0  0  0  0
   10.3303   22.1337    5.0600 C   0  0  0  0  0  0  0  0  0  0  0  0
   11.8245   22.3041    4.8975 C   0  0  0  0  0  0  0  0  0  0  0  0
   12.2448   23.6043    5.5909 C   0  0  0  0  0  0  0  0  0  0  0  0
   11.4144   24.7651    5.0406 C   0  0  0  0  0  0  0  0  0  0  0  0
    9.9381   24.5531    5.3799 C   0  0  0  0  0  0  0  0  0  0  0  0
    9.4307   23.2866    4.6731 C   0  0  0  0  0  0  0  0  0  0  0  0
   12.5498   21.1207    5.5412 C   0  0  0  0  0  0  0  0  0  0  0  0
   12.1744   22.3787    3.4099 C   0  0  0  0  0  0  0  0  0  0  0  0
    7.9973   22.9890    5.1180 C   0  0  0  0  0  0  0  0  0  0  0  0
    9.4675   23.4794    3.2576 O   0  0  0  0  0  0  0  0  0  0  0  0
   11.8720   26.0092    5.6331 O   0  0  0  0  0  0  0  0  0  0  0  0
   11.2666   27.0559    3.7833 O   0  0  0  0  0  0  0  0  0  0  0  0
   11.7446   27.1206    4.8911 C   0  0  0  0  0  0  0  0  0  0  0  0
   12.1978   28.4489    5.4399 C   0  0  0  0  0  0  0  0  0  0  0  0
  1  2  1  0      
  2  3  1  0      
  3  4  1  0      
  4  5  1  0      
  5  6  1  0      
  6  1  1  0      
  2  7  1  0      
  4  8  1  0      
  5  9  1  0      
  6 10  1  0      
  6 11  1  0      
  5 12  1  0      
  4 12  1  0      
  9 13  1  0      
 13 14  1  0      
 14 15  2  0      
 15 16  1  0      
 16 17  2  0      
 17 18  1  0      
 18 19  2  0      
 19 20  1  0      
 20 21  2  0      
 21 22  1  0      
 22 23  2  0      
 23 24  1  0      
 24 25  2  0      
 25 26  1  0      
 26 27  2  0      
 13 28  2  0      
 14 29  1  0      
 18 30  1  0      
 23 31  1  0      
 27 32  1  0      
 33 27  1  0      
 33 34  2  0      
 34 35  2  0      
 35 36  1  0      
 36 37  1  0      
 37 38  1  0      
 38 39  1  0      
 39 40  1  0      
 40 35  1  0      
 36 41  1  0      
 36 42  1  0      
 40 43  1  0      
 40 44  1  0      
 38 45  1  0      
 45 47  1  0      
 46 47  2  0      
 47 48  1  0      
M  STY  1   1 SUP
M  SLB  1   1   1
M  SAL   1  4  45  46  47  48
M  SBL   1  1  47
M  SMT   1 OAc
M  SBV   1 47   -8.8710    6.1834
M  END
$$$$
