# Supplementary material for: Production, Characterization, and Antioxidant Activity of Fucoxanthin from the Marine Diatom Odontella aurita
Source: MDPI journal article supplement (doi:10.3390/md11072667), 2013-07-23
Supplement: s2 [file s2]

marinedrugs-11-02667-s001.mol
  ChemDraw04141418442D

 48 50  0  0  0  0  0  0  0  0999 V2000
   -7.4965   -1.7621    0.0000 C   0  0  0  0  0  0  0  0  0  0  0  0
   -7.4965   -2.5870    0.0000 C   0  0  0  0  0  0  0  0  0  0  0  0
   -6.7821   -2.9995    0.0000 C   0  0  0  0  0  0  0  0  0  0  0  0
   -6.0676   -2.5870    0.0000 C   0  0  0  0  0  0  0  0  0  0  0  0
   -6.0676   -1.7621    0.0000 C   0  0  0  0  0  0  0  0  0  0  0  0
   -6.7821   -1.3496    0.0000 C   0  0  0  0  0  0  0  0  0  0  0  0
   -8.2110   -2.9995    0.0000 O   0  0  0  0  0  0  0  0  0  0  0  0
   -5.3531   -2.9995    0.0000 C   0  0  0  0  0  0  0  0  0  0  0  0
   -5.3531   -1.3496    0.0000 C   0  0  0  0  0  0  0  0  0  0  0  0
   -7.1946   -0.6351    0.0000 C   0  0  0  0  0  0  0  0  0  0  0  0
   -6.3696   -0.6351    0.0000 C   0  0  0  0  0  0  0  0  0  0  0  0
   -5.3531   -2.1745    0.0000 O   0  0  0  0  0  0  0  0  0  0  0  0
   -5.3531   -0.5246    0.0000 C   0  0  0  0  0  0  0  0  0  0  0  0
   -4.6387   -0.1121    0.0000 C   0  0  0  0  0  0  0  0  0  0  0  0
   -3.9243   -0.5246    0.0000 C   0  0  0  0  0  0  0  0  0  0  0  0
   -3.2098   -0.1121    0.0000 C   0  0  0  0  0  0  0  0  0  0  0  0
   -2.4953   -0.5246    0.0000 C   0  0  0  0  0  0  0  0  0  0  0  0
   -1.7809   -0.1121    0.0000 C   0  0  0  0  0  0  0  0  0  0  0  0
   -1.0665   -0.5246    0.0000 C   0  0  0  0  0  0  0  0  0  0  0  0
   -0.3520   -0.1121    0.0000 C   0  0  0  0  0  0  0  0  0  0  0  0
    0.3625   -0.5246    0.0000 C   0  0  0  0  0  0  0  0  0  0  0  0
    1.0769   -0.1121    0.0000 C   0  0  0  0  0  0  0  0  0  0  0  0
    1.7913   -0.5246    0.0000 C   0  0  0  0  0  0  0  0  0  0  0  0
    2.5058   -0.1121    0.0000 C   0  0  0  0  0  0  0  0  0  0  0  0
    3.2202   -0.5246    0.0000 C   0  0  0  0  0  0  0  0  0  0  0  0
    3.9347   -0.1121    0.0000 C   0  0  0  0  0  0  0  0  0  0  0  0
    4.6492   -0.5246    0.0000 C   0  0  0  0  0  0  0  0  0  0  0  0
   -6.0676   -0.1121    0.0000 O   0  0  0  0  0  0  0  0  0  0  0  0
   -4.6387    0.7129    0.0000 C   0  0  0  0  0  0  0  0  0  0  0  0
   -1.7809    0.7129    0.0000 C   0  0  0  0  0  0  0  0  0  0  0  0
    1.7913   -1.3496    0.0000 C   0  0  0  0  0  0  0  0  0  0  0  0
    4.6492   -1.3496    0.0000 C   0  0  0  0  0  0  0  0  0  0  0  0
    5.3531   -0.2157    0.0000 C   0  0  0  0  0  0  0  0  0  0  0  0
    6.0676    0.1968    0.0000 C   0  0  0  0  0  0  0  0  0  0  0  0
    6.7821    0.6093    0.0000 C   0  0  0  0  0  0  0  0  0  0  0  0
    7.4965    0.1968    0.0000 C   0  0  0  0  0  0  0  0  0  0  0  0
    8.2110    0.6093    0.0000 C   0  0  0  0  0  0  0  0  0  0  0  0
    8.2110    1.4342    0.0000 C   0  0  0  0  0  0  0  0  0  0  0  0
    7.4965    1.8467    0.0000 C   0  0  0  0  0  0  0  0  0  0  0  0
    6.7821    1.4342    0.0000 C   0  0  0  0  0  0  0  0  0  0  0  0
    7.0840   -0.5177    0.0000 C   0  0  0  0  0  0  0  0  0  0  0  0
    7.9090   -0.5177    0.0000 C   0  0  0  0  0  0  0  0  0  0  0  0
    6.5685    2.2311    0.0000 C   0  0  0  0  0  0  0  0  0  0  0  0
    6.0676    1.8467    0.0000 O   0  0  0  0  0  0  0  0  0  0  0  0
    8.1036    1.6193    0.0000 O   0  0  0  0  0  0  0  0  0  0  0  0
    6.7233    1.9891    0.0000 O   0  0  0  0  0  0  0  0  0  0  0  0
    7.5202    2.2026    0.0000 C   0  0  0  0  0  0  0  0  0  0  0  0
    7.7338    2.9995    0.0000 C   0  0  0  0  0  0  0  0  0  0  0  0
  1  2  1  0      
  2  3  1  0      
  3  4  1  0      
  4  5  1  0      
  5  6  1  0      
  6  1  1  0      
  2  7  1  1      
  4  8  1  1      
  5  9  1  1      
  6 10  1  0      
  6 11  1  0      
  5 12  1  6      
  4 12  1  6      
  9 13  1  0      
 13 14  1  0      
 14 15  2  0      
 15 16  1  0      
 16 17  2  0      
 17 18  1  0      
 18 19  2  0      
 19 20  1  0      
 20 21  2  0      
 21 22  1  0      
 22 23  2  0      
 23 24  1  0      
 24 25  2  0      
 25 26  1  0      
 26 27  2  0      
 13 28  2  0      
 14 29  1  0      
 18 30  1  0      
 23 31  1  0      
 27 32  1  0      
 33 27  1  1      
 33 34  2  0      
 34 35  2  0      
 35 36  1  0      
 36 37  1  0      
 37 38  1  0      
 38 39  1  0      
 39 40  1  0      
 40 35  1  0      
 36 41  1  0      
 36 42  1  0      
 40 43  1  1      
 40 44  1  6      
 38 45  1  1      
 45 47  1  0      
 46 47  2  0      
 47 48  1  0      
M  STY  1   1 SUP
M  SLB  1   1   1
M  SAL   1  4  45  46  47  48
M  SBL   1  1  47
M  SMT   1 OAc
M  SBV   1 47   -8.8710    6.1834
M  END
